# Supplementary material for: Maternal Vitamin B12 Status during Pregnancy and Early Infant Neurodevelopment: The ECLIPSES Study
Source: MDPI journal article supplement (doi:10.3390/nu15061529), 2023-03-22
Supplement: s1 [file nutrients-2221999-supplementary.pdf › nutrients-2221999-supplementary.pdf]

## Article

# Maternal Vitamin B12 Status during Pregnancy and Early Infant Neurodevelopment: the ECLIPSES Study

Josué Cruz-Rodríguez <sup>1</sup>, Andrés Díaz-López <sup>1,2</sup>, Josefa Canals-Sans <sup>1,2,3</sup> and Victoria Arija <sup>1,2,4,5,\*</sup>

**Table S1.** Maternal characteristics (sociodemographic data, health habits, nutrition, and psychological aspects) of participants included and not included in the analysis.

| Maternal characteristics                                            | Included<br>(n = 434) | Not included<br>(n = 357) | p-value |
|---------------------------------------------------------------------|-----------------------|---------------------------|---------|
| Age (years) <sup>#</sup>                                            | 30.8 ± 5.0            | 29.4 ± 5.0                | <0.001  |
| BMI initial (kg/m <sup>2</sup> ) <sup>#</sup>                       | 24.8 ± 4.3            | 25.3 ± 4.7                | 0.142   |
| Gestational weight gain (kg) <sup>#</sup>                           | 10.3 ± 3.6            | 10.4 ± 3.2                | 0.978   |
| Educational level, n (%)                                            |                       |                           |         |
| Low (primary/secondary)                                             | 278 (64.1)            | 286 (80.1)                | <0.001  |
| High (university)                                                   | 156 (35.9)            | 71 (19.9)                 |         |
| Social class, n (%)                                                 |                       |                           |         |
| Low/medium                                                          | 354 (81.6)            | 304 (85.2)                | 0.179   |
| High                                                                | 80 (18.4)             | 53 (14.8)                 |         |
| Smoking during pregnancy, n (%)                                     |                       |                           |         |
| No                                                                  | 371 (85.5)            | 289 (80.9)                | 0.090   |
| Yes                                                                 | 63 (14.5)             | 68 (19.1)                 |         |
| Alcohol consumption during pregnancy, n (%)                         |                       |                           |         |
| No                                                                  | 363 (86.4)            | 274 (88.4)                | 0.433   |
| Yes                                                                 | 57 (13.6)             | 36 (11.6)                 |         |
| Physical activity during pregnancy (METs/min/week) <sup>#</sup>     | 2362.8 ± 2473.7       | 2607.3 ± 3170.3           | 0.261   |
| MedDiet during pregnancy (score) <sup>#</sup>                       | 9.7 ± 2.1             | 9.5 ± 2.5                 | 0.545   |
| Energy intake during pregnancy (kcal) <sup>#</sup>                  | 2087.1 ± 470.3        | 2184.9 ± 526.0            | 0.012   |
| Vitamin B12 intake during pregnancy (µg) <sup>#</sup>               | 4.3 ± 1.2             | 4.5 ± 1.3                 | 0.135   |
| Folate intake during pregnancy (µg) <sup>#</sup>                    | 199.9 ± 59.3          | 200.2 ± 60.9              | 0.961   |
| Previous parity, n (%)                                              |                       |                           |         |
| No                                                                  | 190 (43.8)            |                           |         |
| Yes                                                                 | 244 (56.)             |                           |         |
| Parenting Stress Index <sup>#</sup>                                 | 50.6 ± 7.9            | 51.6 ± 6.6                | 0.135   |
| Mother anxiety state 1 <sup>st</sup> trimester (score) <sup>#</sup> | 17.3 ± 8.5            | 18.7 ± 9.2                | 0.081   |
| Mother anxiety state 3 <sup>rd</sup> trimester (score) <sup>#</sup> | 19.2 ± 8.7            | 19.0 ± 8.4                | 0.837   |
| Vitamin B12 levels 1 <sup>st</sup> trimester (pg/mL) <sup>#</sup>   | 374.2 ± 127.7         | 359.9 ± 124.1             | 0.159   |
| Vitamin B12 levels 3 <sup>rd</sup> trimester (pg/mL) <sup># +</sup> | 305.2 ± 138.0         | 276.1 ± 116.4             | 0.100   |
| RBC Folate levels 1 <sup>st</sup> trimester (nmol/L)                | 570.4 ± 207.3         | 544.3 ± 196.6             | 0.137   |

Values are expressed as a mean ± SD (standard deviation) <sup>#</sup> or n=number (%). Abbreviations: BMI, body mass index; METs, metabolic equivalent of task, MedDiet, Adherence to the Mediterranean diet; RBC folate, Red blood cell folate. Missing value: Physical activity during pregnancy [n = 90(12.8%)]; MedDiet [n = 61(8.3%)]; Energy intake during pregnancy [n = 61(8.3%)]; Vitamin B12 intake during pregnancy [n = 61(8.3%)]; Folate intake during pregnancy [n = 61(8.3%)]; Parenting Stress Index, [n = 191(31.8%)]; Mother anxiety state 1stT, [n=123(18.4%)]; Mother anxiety state 3rdT [n = 314(65.8%)]; Vitamin B12 levels 1stT [n = 119(17.7%)], Vitamin B12 levels 3rdT [n = 365(85.6%)], RBC folate levels, [n = 229(40.7%)].
